# Supplementary material for: The COX-2/PGE2 Response Pathway Upregulates Radioresistance in A549 Human Lung Cancer Cells through Radiation-Induced Bystander Signaling
Source: MDPI journal article supplement (doi:10.3390/biology12111368), 2023-10-25
Supplement: s1 [file s1]

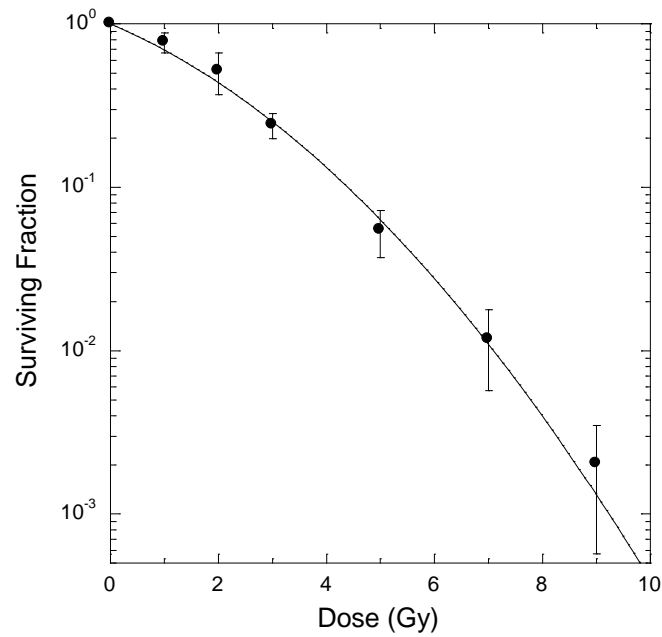

**Figure S1.** A549 cells were exposed to X-ray with dose ranging from 1 to 9 Gy, and the cell survival was determined by colony formation assay. The cells were prepared in T12.5 bottle flasks with  $10^6$  cells. Survival fractions for each dose were averaged from 7 repeated experiments. Error bars represents the standard errors. Solid line is the fitted regression line of linear Quadratic (LQ) model,  $S = \exp(-\alpha \times D - \beta \times D^2)$ , where  $S$  is the surviving fraction,  $D$  is the dose in Gy, and  $\alpha$  ( $\text{Gy}^{-1}$ ) and  $\beta$  ( $\text{Gy}^{-2}$ ) are the fitting parameters. Using the  $\alpha$ ,  $\beta$  parameters 10% surviving dose ( $D_{10}$ ) and 1% surviving dose ( $D_1$ ) were calculated. Parameters  $\alpha$ ,  $\beta$  and  $D_{10}$ ,  $D_1$  are listed in the Table S1.

**Table S1.** The LQ model was employed to calculate fitting parameters:  $\alpha$ ,  $\beta$  and  $D_{10}$ ,  $D_1$  based on the survival rate curve present at Figure S1.

| Dose (Gy) | $\alpha$          | $\beta$           | $D_{10}$        | $D_1$           |
|-----------|-------------------|-------------------|-----------------|-----------------|
| X-ray     | $0.328 \pm 0.055$ | $0.044 \pm 0.034$ | $4.42 \pm 0.35$ | $7.18 \pm 0.67$ |
